# Supplementary material for: Acetylation of Lysine 243 Inhibits the oriC Binding Ability of DnaA in Escherichia coli
Source: PubMed Central journal article supplement (PMC5397419; doi:10.3389/fmicb.2017.00699), 2017-04-20
Supplement: Data_Sheet_1.pdf [file Data_Sheet_1.pdf]

## Supplemental information

**Table S1 Strains and plasmids used in this study.**

| Strains or plasmids               | Description                                                                                                                               | Sources                              |
|-----------------------------------|-------------------------------------------------------------------------------------------------------------------------------------------|--------------------------------------|
| <b>Strains</b>                    |                                                                                                                                           |                                      |
| <i>E. coli</i> DH5 $\alpha$       | F- 80 <i>lacZ</i> M15 ( <i>lacZYA</i> – <i>argF</i> )U169 <i>eoR</i><br><i>recA1endA1 hsdR17 phoA supE44-thi-1</i><br><i>gyrA96 relA1</i> | Laboratory stock                     |
| <i>E. coli</i> KA413              | llv <i>thyA tyrA</i> (Am) <i>trpE9829</i> (Am) <i>metE</i><br><i>deo supF6</i> (Ts) <i>dnaA46</i>                                         | Gift from T.<br>Katayama             |
| <i>E. coli</i> BL21               | F- <i>ompT gal dcm lon hsdSB</i><br>(rB- mB-) $\lambda$ (DE3 [ <i>lacI lacUV5</i> -T7 gene 1<br><i>ind1 sam7 nin5</i> ])                  | Laboratory stock                     |
| BL21 derivatives                  |                                                                                                                                           |                                      |
| <i>his-dnaA</i>                   | [BL21] <i>his-dnaA</i> (cm <sup>R</sup> )                                                                                                 | Laboratory stock                     |
| $\Delta$ <i>cobB-his-dnaA</i>     | [BL21] $\Delta$ <i>cobB-his-dnaA</i> (cm <sup>R</sup> &Kan <sup>R</sup> )                                                                 | Laboratory stock                     |
| $\Delta$ <i>yfiQ-his-dnaA</i>     | [BL21] $\Delta$ <i>yfiQ-his-dnaA</i> (cm <sup>R</sup> &Kan <sup>R</sup> )                                                                 | Laboratory stock                     |
| $\Delta$ <i>ackA-his-dnaA</i>     | [BL21] $\Delta$ <i>ackA-his-dnaA</i> (cm <sup>R</sup> &Kan <sup>R</sup> )                                                                 | Laboratory stock                     |
| $\Delta$ <i>pta-his-dnaA</i>      | [BL21] $\Delta$ <i>pta-his-dnaA</i> (cm <sup>R</sup> &Kan <sup>R</sup> )                                                                  | Laboratory stock                     |
| $\Delta$ <i>ackAcobB-his-dnaA</i> | [BL21] $\Delta$ <i>ackAcobB-his-dnaA</i> (cm <sup>R</sup> &Kan <sup>R</sup> )                                                             | Laboratory stock                     |
| <i>E. coli</i> BW25113            | <i>LacIq rrnBT14</i> $\Delta$ <i>lacZWJ16hsdR514</i><br>$\Delta$ ( <i>araBAD</i> )AH33 $\Delta$ ( <i>rhaBAD</i> )LD78                     | Laboratory stock<br>Laboratory stock |
| <i>BW25113</i> derivatives        |                                                                                                                                           |                                      |

|                               |                                                                              |                  |
|-------------------------------|------------------------------------------------------------------------------|------------------|
| <i>his-dnaA</i>               | [BW25113] <i>his-dnaA</i> (cm <sup>R</sup> )                                 | Laboratory stock |
| $\Delta$ <i>cobB-his-dnaA</i> | [BW25113] $\Delta$ <i>cobB-his-dnaA</i> (cm <sup>R</sup> )                   | Laboratory stock |
| $\Delta$ <i>yfiQ-his-dnaA</i> | [BW25113] $\Delta$ <i>yfiQ-his-dnaA</i> (cm <sup>R</sup> &Kan <sup>R</sup> ) | Laboratory stock |
| $\Delta$ <i>ackA-his-dnaA</i> | [BW25113] $\Delta$ <i>ackA-his-dnaA</i> (cm <sup>R</sup> &Kan <sup>R</sup> ) | Laboratory stock |
| $\Delta$ <i>pta-his-dnaA</i>  | [BW25113] $\Delta$ <i>pta-his-dnaA</i> (cm <sup>R</sup> &Kan <sup>R</sup> )  | Laboratory stock |

### Plasmids

|                                     |                                                                                                             |                            |
|-------------------------------------|-------------------------------------------------------------------------------------------------------------|----------------------------|
| pCDSS                               | Spe <sup>R</sup> , used for plasmid<br>complementation assay                                                | Gift from Peter<br>Schultz |
| pCDSS-K                             | pCDSSara harboring wild-type <i>dnaA</i>                                                                    | Laboratory stock           |
| pCDSS-Q                             | pCDSSara harboring <i>dnaA</i> (K243Q)                                                                      | This work                  |
| pCDSS-R                             | pCDSSara harboring <i>dnaA</i> (K243R)                                                                      | This work                  |
| pAcKRS-3                            | Kan <sup>R</sup> , coding for <i>M. barkeri</i><br>pyrrolysine tRNA synthetase                              | Gift from J Chin           |
| pCDF-PyIT                           | Spe <sup>R</sup> , derivated from pCDFduet and<br>harboring the <i>pyIT</i> gene                            | Gift from J Chin           |
| pCDF-PyIT- <i>dnaA</i>              | Spe <sup>R</sup> , used for protein expression                                                              | Laboratory stock           |
| pCDF-PyIT- <i>dnaA</i><br>(K243TAG) | Spe <sup>R</sup> , used for site-specific acetylated<br>DnaA expression                                     | This work                  |
| pBKS- <i>oriC</i>                   | Amp <sup>R</sup> , derivated from pBluescript II<br>KS(+) and containing the 469-bp <i>oriC</i><br>fragment | Laboratory stock           |

---

**Table S2 Primers used in this study.**

| <b>Primer Name</b>    | <b>Primer Sequence</b>                               |
|-----------------------|------------------------------------------------------|
| K243Q F               | CAGTTTTTTTGCTAATCAAGAACGATCTCAGGAA                   |
| K243Q R               | TTCCTGAGATCGTTCTTGATTAGCAAAAAACTG                    |
| K243R F               | CAGTTTTTTTGCTAATCGAGAACGATCTCAGGAA                   |
| K243R R               | TTCCTGAGATCGTTCTCGATTAGCAAAAAACTG                    |
| K243Ac F              | CAGTTTTTTTGCTAATTAGGAACGATCTCAGGAA                   |
| K243Ac R              | TTCCTGAGATCGTTCCTAATTAGCAAAAAACTG                    |
| pET22b- <i>dnaA</i> F | TCTCCATTAGGTGTCACITTCGCTTTGG                         |
| pET22b- <i>dnaA</i> R | TCTCCTCGAGCGATGACAATGTTCTGAT                         |
| pBKS- <i>oriC</i> F   | CCGGAGCTCGCCAATGATGATGACGTCAA                        |
| pBKS- <i>oriC</i> R   | GGGGTACCAATCGGTATTGGTAGTCGTG                         |
| pCDF- <i>dnaA</i> F   | CCGCCATGGGCCATCATCATCATCATCATTCACTTTGCTT<br>TGGCAGCA |
| pCDF- <i>dnaA</i> R   | GGCTCGAGTTACGATGACAATGTTCTGATT                       |
| 5'FAM- <i>oriC</i> F  | 5'FAM-CCCGGGCCGTGGATTCTACT                           |
| 5'FAM- <i>oriC</i> R  | 5'FAM-CTCGAGGCAGAACTCAAAGA                           |
| 5'FAM-P <i>dnaA</i> F | TGGTCATTAAATTTTCCAATATG                              |
| 5'FAM-P <i>dnaA</i> R | GGCGGACTCCACTCGAAC                                   |
| 5'FAM-DARS1 F         | 5'FAM-GGGGATAGGGGCTGGAGACA                           |
| 5'FAM-DARS1 R         | 5'FAM-CGTGCAAGCCGCGTATTC                             |

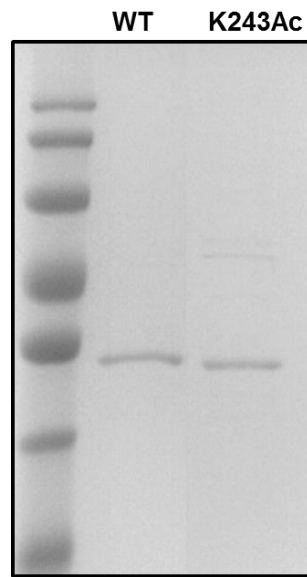

**Figure S1. The purified wild-type and DnaA K243Ac proteins.** The wild-type and DnaA K243Ac (200 ng) were resolved on 10% SDS-PAGE and stained with Coomassie blue.

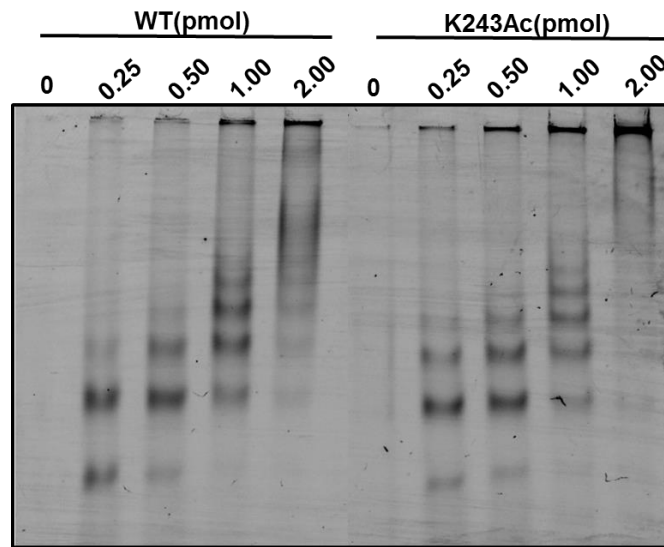

**Figure S2. Binding activities of DnaA to DARS1.** Various amounts (0-2 pmol) of the wild-type and K243Ac ADP-DnaA proteins were incubated with FAM-labeled DARS1 for 5 min at 30°C. Reaction products were analyzed by 5% PAGE and detected by FUJIFILM FLA7000.

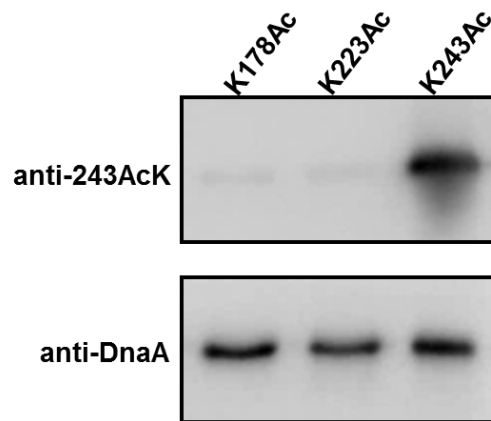

**Figure S3. Evaluation of anti-K243Ac antibody by Western blot.** Three different site-specific acetylated DnaA were purified, and probed by anti-DnaA antibody and anti-K243Ac antibody, respectively. Western blots were independently repeated at least three times.

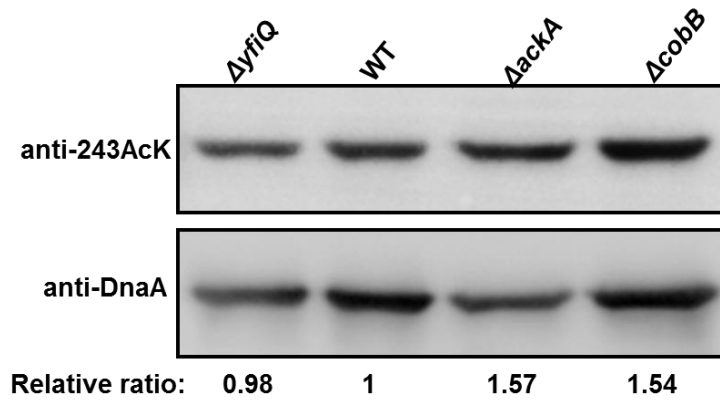

**Figure S4. *In vivo* acetylation level of DnaA K243 in different BW25113 strains.** Native DnaA protein was purified from the wild-type *E. coli* strain BW25113 and three mutant strains at the mid-exponential phase, and they were probed by anti-DnaA antibody and anti-K243Ac antibody, respectively. Western blots were independently repeated at least three times.
